# Supplementary material for: Directly coat TiO2 on hydrophobic NaYF4:Yb,Tm nanoplates and regulate their photocatalytic activities with the core size
Source: Royal Society of Chemistry journal article supplement (doi:10.1039/c4ta02756f), 2014-01-01
Supplement: c4ta02756f1.pdf [file c4ta02756f1.pdf]

## Supporting Information

### Directly Coat TiO<sub>2</sub> on Hydrophobic NaYF<sub>4</sub>:Yb,Tm Nanoplates and Regulate Their Photocatalytic Activities with the Core Size

*Wankui Su,<sup>ab</sup> Mengmeng Zheng,<sup>a</sup> Lei Li,<sup>b</sup> Kun Wang,<sup>b</sup> Ru Qiao,<sup>\*a</sup> Yijun Zhong,<sup>a</sup>  
Yong Hu,<sup>a</sup> and Zhengquan Li<sup>\*ab</sup>*

<sup>a</sup>Institute of Physical Chemistry and <sup>b</sup>Department of Materials Physics,  
Zhejiang Normal University, Jinhua, Zhejiang 321004, P. R. China

### Experimental

**Synthesis of NaYF<sub>4</sub>:Yb,Tm nanoplates.** NaYF<sub>4</sub>:25%Yb, 0.3%Er nanoplates of 50 nm in diameter were synthesized following this protocol: YCl<sub>3</sub> (0.747 mmol), YbCl<sub>3</sub> (0.25 mmol) and TmCl<sub>3</sub> (0.003 mmol) were mixed with 4 mL oleic acid (OA) and 16 mL octadecene (ODE) in a 50 ml flask. The solution was then heated to 160 °C to form a homogeneous solution and cooled down to room-temperature. 10 mL of methanol solution containing NaOH (2.5 mmol) and NH<sub>4</sub>F (4 mmol) were added into the flask and slowly heated to evaporate methanol. After complete removal of methanol, the flask was degassed at 100 °C for 10 min, heated to 300 °C and maintained at this temperature for 1 h under argon atmosphere. After the solution was cooled down naturally, NaYF<sub>4</sub>:Yb,Tm nanoplates were precipitated from the solution with ethanol. Synthesis of NaYF<sub>4</sub>:Yb,Tm nanoplates with other sizes were performed with a similar protocol by varying the reaction time and amount of oleic acids. Detailed parameters are list as follows: 1 h and 3 mL OA for 100 nm nanoplates; 1.5 h and 3 mL OA for 130 nm nanoplates; 1 h and 5 mL OA for 30 nm nanoplates.

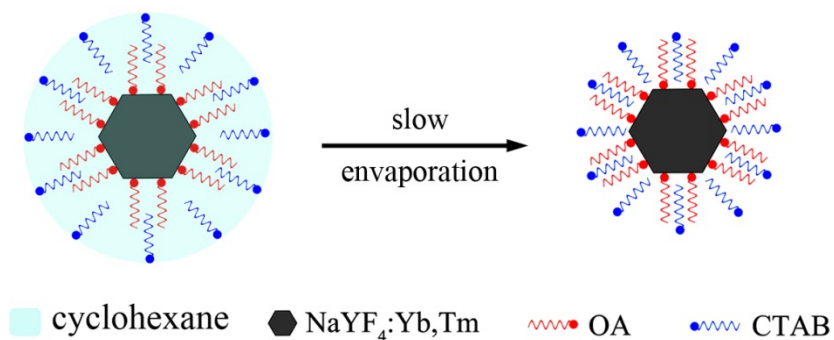

**Scheme S1.** Schematic illustration of the preparation of CTAB-modified NaYF<sub>4</sub>:Yb,Tm nanoplates with reverse-micelle method.

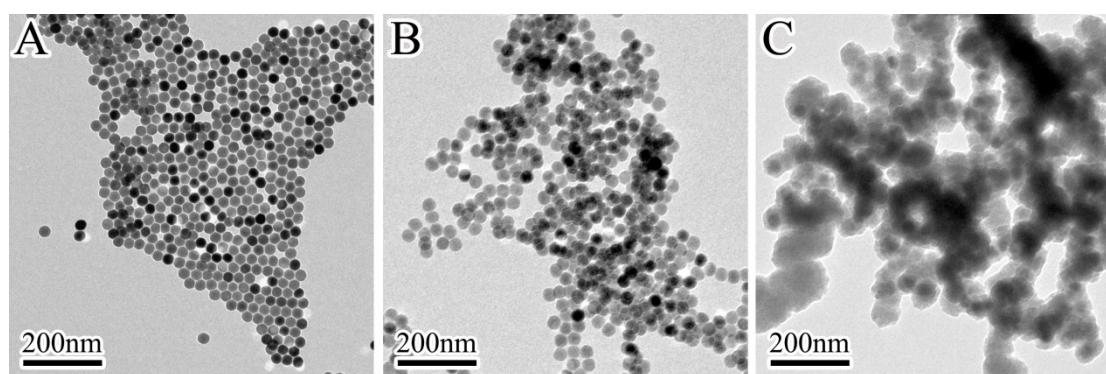

**Figure S1.** TEM images of 30 nm NaYF<sub>4</sub>:Yb,Tm nanoplates at different synthetic stages: (A) primitive nanoplates; (B) CTAB-modified; (C) after TiO<sub>2</sub> coating and annealing.

| Samples | κ under different irradiation bands |         |            |
|---------|-------------------------------------|---------|------------|
|         | UV                                  | NIR     | UV/VIS/NIR |
| P25     | 0.04292                             | 0       | 0.04306    |
| NP30    | 0.0517                              | 0.00465 | 0.05751    |
| NP50    | 0.08342                             | 0.00759 | 0.10722    |
| NP100   | 0.05103                             | 0.00522 | 0.06714    |
| NP130   | 0.04363                             | 0.00501 | 0.05492    |

**Table S1.** Apparent rate constants of P25 and NaYF<sub>4</sub>:Yb,Tm@TiO<sub>2</sub> NPs with varied core sizes under different irradiation bands. Above data indicate that NPs with 50 nm core size have the best photocatalytic performance in each band than other samples.
